1  
2  
3  
4  
5  
6  
7  
8  
9  
10  
11  
12  
13  
14  
15  
16  
17  
18  
19  
20  
21  
22  
23  
24  
25  
26  
27  
28  
29  
30  
31

# Occupational Health Management in New Work – a Protocol for a Mixed-Method Study: Project BGM4NewWork

Carla Rinne<sup>1¶, #a</sup>, Fiona Niebuhr<sup>1¶, #a</sup>, Anna-Sophia Wawera<sup>1&, #a</sup> and Susanne Voelter-Mahlknecht<sup>1&, #a</sup>

<sup>1</sup> Institute of Occupational Medicine, Charité—Universitaetsmedizin Berlin, Corporate Member of Freie Universität Berlin and Humboldt Universität zu Berlin

<sup>#a</sup> Current Address: Institute of Occupational Medicine, Charité – Universitaetsmedizin Berlin, Berlin, Germany

\* Corresponding author

E-mail: [carla.rinne@charite.de](mailto:carla.rinne@charite.de) (CR)

¶ These authors contributed equally to this work.

& These authors also contributed equally to this work.

**NOTE: This preprint reports new research that has not been certified by peer review and should not be used to guide clinical practice.**

## 32 **Abstract**

33

34 **Background:** The world of work is undergoing profound changes towards agile, flexible,  
35 democratic, and digital forms of work, so called *New Work* (NW). The COVID-19 pandemic  
36 accelerated these changes and confronted the working world with new challenges. Effects on  
37 employee health are ambivalent and remain unclear. Moreover, there is a lack of evidence as  
38 to whether existing occupational health management (OHM) measures meet the needs of  
39 employees working in new forms of work.

40

41 **Methods/Design:** This prospective mixed-method project will include four substudies to  
42 identify different NW forms, resulting health risk, benefits and protective factors in  
43 subgroups, and derive target group-specific OHM services. In the four substudies, the  
44 following methods will be used: (1) a scoping review, semi-standardized interviews, and an  
45 online survey, (2) a systematic review, an online survey, an expert workshop and qualitative  
46 interviews, (3) workplace observations, and (4) expert workshops. Recommendations for  
47 action will be derived from the findings of all substudies and summarized in a checklist for  
48 OHM in NW settings.

49

50 **Conclusion:** Findings will expand the state of knowledge about NW settings and associated  
51 health effects. The development of an evidence-based checklist for target group-specific  
52 identification of NW settings and associated health risks, benefits and protective factors can  
53 be used as a basis for action regarding OHM in companies. The findings can provide guidance  
54 on how future OHM services should be designed to meet the needs of employees.

55

56 **Keywords:** New forms of work; Work 4.0; Corporate Health Management; Digitalization;  
57 Health; Workplace; Public Health; Occupational Health; Occupational Medicine;  
58 Occupational Health Psychology

59

## 61 Introduction

62 Even before the COVID-19 pandemic, there have been transformations in the world of work  
63 towards agile, flexible, democratic, and digital forms of work, so called *New Work* (NW). NW is used  
64 as a term in multiple and heterogeneous ways; however, there is still no consensus on a uniform  
65 definition. It can be seen as a “container term”; a construct which is sometimes arbitrarily expanded or  
66 reduced [1]. Its original meaning can be traced back to Bergmann [2], who argued that people used to  
67 serve work. In the sense of today’s understanding of NW, however, work should serve the people.  
68 This “inversion” is central to understanding NW. Accordingly, NW can offer the opportunity to  
69 strengthen the resources of employees.

70 External, global, and local factors influence the NW transformation. In addition to  
71 globalization and climate change, the COVID-19 pandemic also acted as a catalyst for developments  
72 towards NW. Clear effects can be seen, for example, with regard to digitalization. Companies  
73 introduced NW measures, such as new digital and virtual tools, as this enables companies to improve  
74 their performance and actively adapt to the transformation process and external global factors [3]. A  
75 growing number of employees around the world were increasingly working in NW settings. This  
76 sudden change of work settings due to the pandemic was unprepared and led to various  
77 inconveniences for the workers such as unprepared desktop environment and a lack of information  
78 tools [4]. Furthermore, the COVID-19 pandemic led to increased locational flexibility, such as  
79 *working from home* (WFH). Prior to the pandemic, more than half of German employees had the  
80 option WFH—an opportunity that often remained unused [5]. The COVID-19 pandemic increased the  
81 proportion of employees WFH from 12% to up to 35% [6] and this trend continues—in 2021, 24.8%  
82 of the workforce in Germany worked from home occasionally and 10% daily [7]. The changes toward  
83 NW extend beyond the end of the COVID-19 pandemic. The trend for WFH apparently continues and  
84 will shape the future of work. In a study examining researchers’ experience of WFH, 66% want to  
85 increase their time WFH compared to their time WFH before the COVID-19 pandemic [8]. In  
86 summary, the pandemic has forced the world of work to make rapid changes towards NW, and this  
87 rapid change has led to longer-term movements towards more flexible and digital forms of work.

88 This movement in the world of work has a wide range of effects on employees and their  
89 health. Health effects resulting from new forms of work, such as flexible forms of work in terms of  
90 time and place, are the subject of controversial debates [9, 10]. In a systematic review, Lunde et al.  
91 [11] examined health outcomes of WFH including pain, well-being, overall-health, and burnout. They  
92 found both studies with positive effects and studies with negative effects on employee health. For  
93 example, Anderson et al. [12] examined, that employees reported higher positive affective well-being  
94 on days WFH. Furthermore, WFH was found to be associated with lower symptoms of depression in  
95 mothers with young children [13], as well as with a reduction in stress [14, 15]. Additionally, WFH  
96 can increase concentration and reduce work interruptions [16] and employees might experience an

97 improved work-life balance while WFH [17]. On the other hand, Lunde et al. [11] also examined  
98 studies that found negative effects of WFH on health parameters. Song and Gao [18] reported an  
99 association of higher stress levels with WFH; other studies found no association between WFH and  
100 general health [19, 20]. In a study of German employees, a higher proportion of WFH was found to be  
101 associated with stress-related symptoms [21]. However, aspects such as high functionality of technical  
102 equipment while WFH showed positive effects on employee health [21]. Nonetheless, flexible work in  
103 the form of WFH can also increase back pain, lead to weight gain [22] and correlate with sleep quality  
104 [23] as well as psychosocial problems, e.g., cabin fever, isolation, and loss of concentration [24].  
105 Moreover, other NW settings such as perceived flexibility at work can counterbalance negative effects  
106 of organizational, individual, and psychosocial factors of work-life balance [25]. Overall, there are  
107 ambivalent associations regarding the health of employees in NW settings; health-promoting as well  
108 as health-endangering effects are empirically supported.

109 *Occupational health management (OHM)* aims to maintain and improve the long-term health  
110 of employees at the individual and collective level [26]. OHM includes sustainable, systematic, and  
111 holistic measures of organizational and process design and takes all relevant interactions of work and  
112 health into account [27]. The spatial and temporal diversification of work (e.g., through WFH,  
113 coworking, and flexible working hours) as well as constant accessibility due to advanced digitalization  
114 pose challenges to the world of work and to OHM. Previous OHM approaches are not sufficiently  
115 tailored to forms of NW [28]. As the health effects of NW settings are not sufficiently studied, the  
116 requirements for the design of efficient OHM structures within these NW settings remain unclear.  
117 However, studies on these issues are essential, because most employees want to continue working in  
118 NW settings after the abrupt changes caused by COVID-19 and not return to pre-pandemic structures.

119 Examining health effects of NW and designing efficient OHM structures is a main aim of the  
120 project *BGM4NewWork*. OHM services should be demand-oriented. Because needs and risk factors  
121 are ambivalent across different NW settings and for different subgroups of employees, we will  
122 examine subgroups extracted from the empirical data using cluster analyses. The aim is to derive  
123 recommendations for action for OHM that are oriented toward the needs of employees in the  
124 corresponding subgroups and take into account the risks, benefits and protective factors of work in the  
125 specific subgroups of NW settings. The project BGM4NewWork is a third party funded consortium  
126 project with the partner UseTree GmbH (UseTree). UseTree focuses on the introduction of agile,  
127 human-centered work processes in companies and supports the development of holistic, innovative  
128 product solutions in the digital field. In addition, the project is supported by partners from  
129 cooperatives, health insurance companies, and business associations, among others.

130 The overall goal is to synthesize the data of all substudies of the project. This evidence  
131 synthesis will be used to develop a checklist based on subgroups of NW settings and associated health  
132 risks, benefits, and protective factors. This *BGM4NW-Checklist* will be used to derive suitable, needs-

133 oriented OHM services. Accordingly, already implemented OHM services are compared with the  
134 current needs of employees in NW settings, and impulses for new or modified OHM services will be  
135 derived. We therefore aim to contribute to closing the described gaps in health care in NW settings. In  
136 addition, requirements and obstacles of OHM services and challenges of access and interfaces between  
137 and within sectors and providers will be identified. Based on an explorative mixed-method study  
138 design and thus on empirical foundation of qualitative (i.e., interviews and workshops) as well as  
139 quantitative data (questionnaire data), the following main research questions (RQ) will be addressed:

140 RQ1a: Which subgroups of employees can be identified within NW settings?

141 RQ1b: Which subgroups of NW settings can be determined?

142 RQ2: What are the health needs and demands of different subgroups of employees and NW  
143 settings, and to what extent are there differences between these subgroups?

144 RQ3: How should OHM access and services be designed in NW work settings?

145 RQ4: How can OHM services and interfaces between and within sectors and OHM providers be  
146 improved in terms of insights into the health needs and demands of different subgroups of  
147 employees and NW settings?

## 148 **Method**

149 We will conduct a prospective mixed-method design for our project, which is divided into four  
150 substudies (Fig 1) and is expected to take place between June 2022 and May 2025. Within the scope of  
151 our project, we focus on different effects of NW settings. Hence, we will identify associated health  
152 risks, benefits and protective factors in employee subgroups and finally derive recommendations for  
153 target group-specific OHM measures. All information provided here is based on the project plan. At  
154 the time of the publication of this study protocol, the project team was working on substudy 1.

## 155 **Materials and methods**

156 In the following, the study design, procedures, and recruitment of participants in the  
157 substudies will be described. The evidence of all substudies will be synthesized in order to achieve the  
158 overall goal of developing the BGM4NW-Checklist. Each substudy involves different methods and  
159 data collection methods. Furthermore, the aims of substudies and interdependencies will be examined.

160

161

162

163

164 **Figure 1.**

165 Overview of Substudies and Aim

166

167

168 **Substudy 1: Subgroups of NW Settings & Employees**

169 The aim of substudy 1 is to address the first research question by identifying subgroups of NW  
170 settings and employees. Therefore, we postulate the following hypotheses:

171 H1a: Subgroups of NW settings can be identified.

172 H1b: Employee subgroups within NW settings can be identified.

173 To classify different subgroups of NW settings and employees, a *scoping review*, a *first online*  
174 *survey*, and *semi-standardized interviews* will be conducted.

175 The aim of the *scoping review* is to map out the most common settings of NW and the different  
176 subgroups of employees working in NW settings. The scoping review will follow the methodological  
177 framework of Arksey and O'Malley [29], which is one of the most commonly used frameworks for  
178 conducting scoping reviews in health and social sciences and will include studies from the databases  
179 Web of Science, Medline, PsycArticle, PsycInfo, Psycindex, and PubMed. All search strings will contain  
180 the following keywords “new work” or “work 4.0” and will be extended by AND connections; further  
181 search terms in German or English are “agility”, “flexibility”, “digitalization”, “empowerment”,  
182 “participation”, “digital leadership”, and “dissolution of boundaries”. Suitable synonyms of the search  
183 terms will also be researched based on piloting the search strings. All abstracts will be screened by the  
184 research team and following the PRISMA guidelines [30], relevant articles will be included. Data will  
185 be extracted for the type of study, author(s), title/year of publication, aims and objectives, setting and  
186 population group, and methodological design, and different forms of NW as well as different subgroups  
187 of employees working in NW will be mapped out.

188 An interview guideline for the *semi-standardized interviews* ( $N = 24$ ) will be developed  
189 based on the literature extracted within the scope of the scoping review. Employees ( $n = 12$ ) and  
190 decision-makers ( $n = 12$ ; e.g., managers, work council) from companies with various forms of  
191 implemented NW work structures will be recruited for the semi-standardized interviews through the  
192 network of project partners.

193 Using the results of the scoping review, the *first online survey* will be compiled using various  
194 validated and established questionnaires and supplemented with own questions. The focus will be on  
195 the experience of new forms of work, the respective implementation in companies as well as  
196 opportunities and challenges within NW. The online survey will include questions about demography,  
197 work context, work activity, work culture, leadership, health, and new work. An a priori power  
198 analysis (G\*Power Version 3.1.9.6) was conducted for an ANOVA to compare subgroups, resulting in  
199 a minimum sample size of  $N = 375$ . Our calculation included a small to medium effect ( $\eta^2 = .04$ ,  $f =$

200 .204),  $\alpha = .05$  and power = .9. To recruit participants for the online survey a panel company will be  
201 contracted. Working with a panel company ensures heterogeneous samples as well as guaranteed  
202 participation of the same employees at both measuring points. Since the questionnaire is a two-part  
203 questionnaire, the two measuring points are only two weeks apart and individuals with significant  
204 work-related changes, e.g., employees who changed their jobs, will be excluded. To identify  
205 subgroups of NW settings and employees within the quantitative data, a cluster analysis will be  
206 conducted. The cluster analysis will follow the methodological framework of Clatworthy et al. [31].  
207 Participants working in companies with NW structures will be recruited. To consider all target groups,  
208 participants aged 18 to 65 years will be eligible to complete the survey. In particular, we aim to  
209 represent the group of over 55-year-olds in the data in order to be able to depict the age structure of the  
210 workforce in Germany. In addition, we assume that the group of over 55-year-olds has specific health  
211 risks and needs in the context of NW.

## 212 **Substudy 2: Health Risks, Benefits & Protective Factors**

213 The aim of substudy 2 is to identify health risks and benefits of NW settings in order to  
214 examine RQ2. Therefore, we postulate the following hypotheses:

215 H2a: Subgroups of NW settings are associated with specific health risks, benefits, and protective  
216 factors.

217 H2b: Employee subgroups in NW settings have differentiated health risks, benefits, and  
218 protective factors.

219 Following the multi-method approach, a *systematic review* will be performed. The aim is to  
220 examine the relationships between a specific NW setting and specific health outcomes.

221 Furthermore, in substudy 2, the *second online survey* will be conducted. Participants from  
222 substudy 1 will be invited to complete the survey again via the panel company. The second online  
223 survey will include questions about demography, health, individual and organizational health  
224 associated risks, benefits, and protective factors. Some identical items will be used in order to control  
225 for changes between the first and second online questionnaire. Relevant health aspects and questions  
226 related to OHM will be added to the online questionnaire for the second survey.

227 In addition, substudy 2 will include *expert workshop I* with different stakeholders of OHM ( $N = 10$ ), e.g., from occupational medicine, statutory pension, accident, and health insurance companies.  
228 The aim is to identify relevant NW settings and to explore what challenges the experts know from  
229 practice. The expert workshop will be used to identify initial findings on relevant health risks, benefits,  
230 and protective factors for working in NW settings as well as challenges for OHM. Participants will be  
231 recruited with the support of the project partners. The implementation will be based on focus groups; a  
232 guideline for the workshops will be prepared in advance.

233  
234 Finally, exploratory *initial qualitative interviews* with employees ( $N = 35$ ) will be conducted  
235 in substudy 2. Participating employees will be recruited from different NW settings with the support of

236 project partners. The focus of the interviews is on health risks, benefits, and protective factors of NW  
237 settings. The results of the qualitative interviews will be used to derive initial target group-related  
238 criteria and objectives to be used in substudy 3.

### 239 **Substudy 3: Needs & Requirements for OHM**

240 Focusing on RQ3, we will explore in the third substudy, how OHM access and services should  
241 be designed in NW settings by exploring the following hypotheses:

242 H3a: Employees in NW settings have specific needs in terms of OHM.

243 H3b: Influences and obstacles can be identified that have an impact on the access to and  
244 application of OHM.

245 The aim is to identify weak points between the needs of employees and the company's  
246 offerings by comparing existing OHM measures with the current needs of employees, in order to  
247 derive impulses for new or modified OHM measures.

248 To identify the needs and requirements of OHM measures, *context analyses* and *workplace*  
249 *observations* will be conducted and use cases for practice will be derived by our consortium partner  
250 UseTree. Therefore, participants of the *qualitative interviews* ( $N = 35$ ) of substudy 2 will be asked to  
251 participate in the workplace observations as well. The qualitative interviews and the workplace  
252 observations will be repeated after one year with the same participants in order to be able to map  
253 changes. We consider this important due to the velocity of the transformation processes in the current  
254 world of work.

### 255 **Substudy 4: OHM Services, Interfaces & Providers**

256 Substudy 4 is designed to explore the fourth research question - how can OHM services and  
257 interfaces between and within sectors and OHM providers be improved? Hence, we postulate the  
258 following hypotheses:

259  
260 H4a: Existing OHM services do not meet the specific requirements and needs of employees in NW  
261 settings.

262 H4b: Relevant OHM providers are not sufficiently integrated in terms of interfaces and offerings  
263 and networked across sectors.

264 Therefore, current OHM offers will be analyzed and discussed in *expert workshops II & III* in  
265 substudy 4. Interfaces and obstacles will be identified in a participatory approach together with the  
266 stakeholders. Participants of the expert workshop will be recruited via project partners. In expert  
267 workshop II ( $n = 10$ ) company doctors, representatives of statutory pension, accident- and health  
268 insurance funds as well as experts in the field of human resources management from the involved  
269 project partners will participate. In expert workshop III ( $n = 10$ ), health and safety representatives in  
270 NW settings, representatives of employer and employee associations and experts in the field of  
271 digitalized work from the project partners will participate.



272 Finally, all insights gained will be combined to develop the BGM4NW checklist. The results will  
273 be iteratively discussed with the project partners, processed and made available for their practice. The  
274 focus is on the promotion of health services in Germany.

## 275 **Data Analyses**

276 All data will be processed by the research team. R-Studio and IBM SPSS Statistics  
277 (International Business Machines Corporation, Armonk, NY, USA) will be used to analyze the  
278 quantitative questionnaire data. For all analyses, the significance level will be set at 0.05. Outliers will  
279 be checked manually. Plausibility checks will be performed to ensure data quality. Descriptive and  
280 inferential statistical analyses will be performed to explore the research questions and test derived  
281 hypotheses. Cluster analyses will be used to synthesize the quantitative data to find subgroups of  
282 employees and NW settings. Qualitative data from interviews and workshops will be transcribed and  
283 subsequently analyzed using MAXQDA, following the approach of qualitative content analysis by  
284 Mayring [32]. The coding strategy combines deductive as well as inductive procedures.

## 285 **Monitoring and Ethics**

286 The project has been submitted to and approved by the ethics committee of Charité –  
287 Universitätsmedizin Berlin (No. EA2/189/22). In addition, a data management plan for the study  
288 (including all substudies) was developed and reviewed by the Clinical-Trial-Officers from Charité.  
289 Only the research team will have access to the original data. All participants generate a code.  
290 Consequently, it is no longer possible to assign data to individuals after the data have been  
291 pseudonymized. All participants in all substudies will give their informed consent before data  
292 collection. The invitations to participate explicitly state that participation is voluntary and that non-  
293 participation or drop-out will not have any negative consequences.

294 The project will be conducted in accordance with the Declaration of Helsinki and the  
295 Guidelines of Good Epidemiologic Practice (GEP) of the International Epidemiological Association  
296 (IEA) and findings will be published in academic journals. Moreover, analyses and publications will  
297 be conducted in line with the European Code of Conduct for Research Integrity, Revised Edition  
298 (2017) and the Guidelines for ensuring good scientific practice.

## 299 **Conclusion**

300 The project BGM4NewWork will follow a participatory multi-method design to develop an  
301 evidence-based checklist for target group-specific identification of NW settings and employee  
302 subgroups and their health risks, benefits, and protective factors. This aim will be addressed in four  
303 substudies, and the findings will be disseminated through publications in academic journals and  
304 multiplied by the involvement of project partners, i.e., OHM stakeholders. The knowledge of NW

305 settings and employee subgroups, associated risks, accesses and barriers of OHM measures and the  
306 checklist will be used to maintain and improve the health of employees. Findings about target group-  
307 specific needs regarding OHM measures could inspire following intervention projects in the future.  
308

## 309 **Acknowledgements**

310 We thank Luara Severin dos Santos for her support in developing the concept of the project and  
311 Leonie Leitner for her support preparing the manuscript.

312

313

## 314 **Author Contributions**

315 C.R., F.N., A.W. and S.V.-M. collaborated in the conception and implementation of this research  
316 project. C.R. and F.N. wrote the manuscript including figures. A.W. and S.V.-M. revised the  
317 manuscript. All authors reviewed, read, and approved the final manuscript.

318 **Funding:** The publication of this manuscript and the BGM4NewWork project are externally funded  
319 by the Innovation Fund for the Promotion of Health Services Research (§ 92a paragraph 2 sentence 1  
320 SGB V). The funding code is 01VSF21045. The funding is provided by the Innovation Committee of  
321 the Gemeinsamer Bundesausschuss (G-BA), Postfach: 12 06 06, 10596 Berlin. The funding is for the  
322 period from 01.06.2022 to 31.05.2025. [https://innovationsfonds.g-](https://innovationsfonds.g-ba.de/projekte/versorgungsforschung/bgm4newwork-staerkung-der-praevention-in-unternehmen-mit-raeumlich-und-zeitlich-entgrenzten-digitalen-arbeitsformen.463)  
323 [ba.de/projekte/versorgungsforschung/bgm4newwork-staerkung-der-praevention-in-unternehmen-mit-](https://innovationsfonds.g-ba.de/projekte/versorgungsforschung/bgm4newwork-staerkung-der-praevention-in-unternehmen-mit-raeumlich-und-zeitlich-entgrenzten-digitalen-arbeitsformen.463)  
324 [raeumlich-und-zeitlich-entgrenzten-digitalen-arbeitsformen.463](https://innovationsfonds.g-ba.de/projekte/versorgungsforschung/bgm4newwork-staerkung-der-praevention-in-unternehmen-mit-raeumlich-und-zeitlich-entgrenzten-digitalen-arbeitsformen.463)

325 **Availability of data and materials:** To date, the data of the scoping review, semi-standardized  
326 interviews, both online-questionnaires I and II are available. The further data collection has not yet  
327 started. Later, the data collected within this project can be requested from the corresponding author  
328 upon reasonable request. The data will not be publicly available, as this was assured to the participants  
329 in the study information as well as in the privacy statement.

330 **Ethics approval and consent to participate:** The study protocol is in line with the current version of  
331 the Declaration of Helsinki (2013) and therefore approved by the Ethics Committee of the Charité –  
332 Universitaetsmedizin Berlin (No. EA2/189/22).

333 **Consent for publication:** The article has not been published elsewhere. In addition, this manuscript is  
334 not considered for publication in another journal. All authors consent to the publication of this  
335 manuscript in PLOSone.

336 **Competing interests:** The authors declare that there are no conflicts of interest. There is only an  
337 interest in the publication of this article. The funders had no influence on the design of the project and  
338 will have no influence on the analyses or interpretation of the data. In addition, they had no influence  
339 on the writing of the manuscript.

340

341

## 342 References

- 343 1. Schermuly CC. Arbeitsphilosophen – Die Zukunft der Arbeit. In: Eilers F, editor. New Work  
344 Utopia: Eine bessere Arbeitswelt ohne Angst und Panikmache! Prof Carsten Schermuly –  
345 Wissenschaftler2022.
- 346 2. Bergmann F. Neue Arbeit, Neue Kultur: Arbor; 2017.
- 347 3. Wu W, Wang H, Lu L, Ma G, Gao X. How firms cope with social crisis: The mediating role of  
348 digital transformation as a strategic response to the COVID-19 pandemic. PLoS One.  
349 2023;18(4):e0282854. doi: 10.1371/journal.pone.0282854.
- 350 4. Niu Q, Nagata T, Fukutani N, Tezuka M, Shimoura K, Nagai-Tanima M, et al. Health effects  
351 of immediate telework introduction during the COVID-19 era in Japan: A cross-sectional study. PLoS  
352 One. 2021;16(10):e0256530. Epub 20211008. doi: 10.1371/journal.pone.0256530. PubMed PMID:  
353 34624027; PubMed Central PMCID: PMCPMC8500427.
- 354 5. Alipour J-V, Falck O, Schüller S. Homeoffice während der Pandemie und die Implikationen für  
355 eine Zeit nach der Krise. ifo Schnelldienst. 2020;73(07):30–6.
- 356 6. Bellmann L, Hübler O. Homeoffice braucht klare Regeln: IAB-Forum; 2020. Available from:  
357 <https://www.iab-forum.de/homeoffice-braucht-klare-regeln/>.
- 358 7. Destatis. Ein Viertel aller Erwerbstätigen arbeitete 2021 im Homeoffice 2022. Available from:  
359 [https://www.destatis.de/DE/Presse/Pressemitteilungen/Zahl-der-  
360 Woche/2022/PD22\\_24\\_p002.html#:~:text=Ein%20Viertel%20aller%20Erwerbstätigen%20arbeitete%  
361 202021%20im%20Homeoffice%20%2D%20Statistisches%20Bundesamt.](https://www.destatis.de/DE/Presse/Pressemitteilungen/Zahl-der-Woche/2022/PD22_24_p002.html#:~:text=Ein%20Viertel%20aller%20Erwerbstätigen%20arbeitete%202021%20im%20Homeoffice%20%2D%20Statistisches%20Bundesamt.)
- 362 8. Aczel B, Kovacs M, van der Lippe T, Szaszi B. Researchers working from home: Benefits and  
363 challenges. PLoS One. 2021;16(3):e0249127. Epub 20210325. doi: 10.1371/journal.pone.0249127.  
364 PubMed PMID: 33765047; PubMed Central PMCID: PMCPMC7993618.
- 365 9. Badura B, Ducki A, Schröder H, Klose J, Meyer M, editors. Fehlzeiten-Report 2019.  
366 Digitalisierung – gesundes Arbeiten ermöglichen. Berlin: Springer; 2019.
- 367 10. Borle P, Boerner-Zobel F, Voelter-Mahlknecht S, Hasselhorn HM, Ebener M. The social and  
368 health implications of digital work intensification. Associations between exposure to information and  
369 communication technologies, health and work ability in different socio-economic strata. Int Arch Occup  
370 Environ Health. 2021;94(3):377–90. doi: 10.1007/s00420-020-01588-5.
- 371 11. Lunde L-K, Fløvik L, Christensen JO, Johannessen HA, Finne LB, Jørgensen IL, et al. The  
372 relationship between telework from home and employee health: A systematic review. BMC Public  
373 Health. 2022;22(1):47. doi: 10.1186/s12889-021-12481-2.
- 374 12. Anderson AJ, Kaplan SA, Vega RP. The impact of telework on emotional experience: When,  
375 and for whom, does telework improve daily affective well-being? Eur J Work Organ Psychol.  
376 2015;24(6):882–97. doi: 10.1080/1359432X.2014.966086.

- 377 13. Shepherd-Banigan M, Bell JF, Basu A, Booth-LaForce C, Harris JR. Workplace stress and  
378 working from home influence depressive symptoms among employed women with young children. *Int*  
379 *J Behav Med*. 2016;23(1):102–11. doi: 10.1007/s12529-015-9482-2. PubMed PMID: 25894581.
- 380 14. Delanoëije J, Verbruggen M. Between-person and within-person effects of telework: A quasi-  
381 field experiment. *Eur J Work Organ Psychol*. 2020;29(6):795–808. doi:  
382 10.1080/1359432X.2020.1774557.
- 383 15. Fonner KL, Roloff ME. Testing the connectivity paradox: Linking teleworkers' communication  
384 media use to social presence, stress from interruptions, and organizational identification. *Commun*  
385 *Monogr*. 2012;79(2):205–31. doi: 10.1080/03637751.2012.673000.
- 386 16. Tavares AI. Telework and health effects review. *Int J Healthc*. 2017;3(2):30–6. doi:  
387 10.5430/ijh.v3n2p30.
- 388 17. Ervasti J, Aalto V, Pentti J, Oksanen T, Kivimäki M, Vahtera J. Association of changes in work  
389 due to COVID-19 pandemic with psychosocial work environment and employee health: A cohort study  
390 of 24 299 Finnish public sector employees. *Occup Environ Med*. 2022;79(4):233–41. doi:  
391 10.1136/oemed-2021-107745.
- 392 18. Song Y, Gao J. Does telework stress employees out? A study on working at home and subjective  
393 well-being for wage/salary workers. *J Happiness Stud*. 2020;21(7):2649–68. doi: 10.1007/s10902-019-  
394 00196-6.
- 395 19. Kröll C, Nüesch S. The effects of flexible work practices on employee attitudes: Evidence from  
396 a large-scale panel study in Germany. *Int J Hum Resour Manag*. 2019;30(9):1505–25. doi:  
397 10.1080/09585192.2017.1289548.
- 398 20. Reuschke D. The subjective well-being of homeworkers across life domains. *Environment and*  
399 *Planning A: Economy and Space*. 2019;51(6):1326–49. doi: 10.1177/0308518x19842583.
- 400 21. Niebuhr F, Borle P, Börner-Zobel F, Voelter-Mahlknecht S. Healthy and happy working from  
401 home? Effects of working from home on employee health and job satisfaction. *Int J Environ Res Public*  
402 *Health*. 2022;19(3):1122. doi: 10.3390/ijerph19031122.
- 403 22. Guler MA, Guler K, Gunecer Gulec M, Ozdoglar E. Working from home during a pandemic:  
404 Investigation of the impact of COVID-19 on employee health and productivity. *Int Arch Occup Environ*  
405 *Health*. 2021;63(9):731–41. doi: 10.1097/jom.0000000000002277. PubMed PMID: 00043764-  
406 202109000-00002.
- 407 23. Matsumoto Y, Kumadaki K, Hino A, Itani O, Otsuka Y, Kaneita Y. Optimal telework frequency  
408 in terms of sleep and labor productivity depends on the workers' psychological distress: A cross-  
409 sectional study in Tokyo, Japan. *PLOS ONE*. 2023;18(6):e0286699. doi:  
410 10.1371/journal.pone.0286699.
- 411 24. Ekpanyaskul C, Padungtod C. Occupational health problems and lifestyle changes among  
412 novice working-from-home workers amid the COVID-19 pandemic. *Saf Health Work*. 2021;12(3):384–

- 413 9. Epub 20210206. doi: 10.1016/j.shaw.2021.01.010. PubMed PMID: 33747597; PubMed Central  
414 PMCID: PMC7954240.
- 415 25. Bjärntoft S, Hallman DM, Mathiassen SE, Larsson J, Jahnce H. Occupational and individual  
416 determinants of work-life balance among office workers with flexible work arrangements. *Int J Environ*  
417 *Res Public Health*. 2020;17(4):1418. doi: 10.3390/ijerph17041418.
- 418 26. Pfaff H, Zeike S. Controlling im Betrieblichen Gesundheitsmanagement. Controlling im  
419 Betrieblichen Gesundheitsmanagement: Das 7-Schritte-Modell. Wiesbaden: Springer Gabler; 2019. p.  
420 41–59.
- 421 27. Ausschuss für Arbeitsmedizin. Betriebliches Gesundheitsmanagement (BGM) –  
422 Arbeitsmedizinische Empfehlung. Bonn: Bundesministerium für Arbeit und Soziales; 2020.
- 423 28. Janda V, Guhlemann K. Sichtbarkeit und Umsetzung – die Digitalisierung verstärkt bekannte  
424 und erzeugt neue Herausforderungen für den Arbeitsschutz (1. Auflage). Dortmund: Bundesanstalt für  
425 Arbeitsschutz und Arbeitsmedizin; 2019. 19 p.
- 426 29. Arksey H, O'Malley L. Scoping studies: Towards a methodological framework. *Int J Soc Res*  
427 *Methodol*. 2005;8(1):19–32. doi: 10.1080/1364557032000119616.
- 428 30. Moher D, Liberati A, Tetzlaff J, Altman DG, PRISMA Group. Preferred reporting items for  
429 systematic reviews and meta-analyses: The PRISMA statement. *Ann Intern Med*. 2009;151(4):264–9.  
430 doi: 10.7326/0003-4819-151-4-200908180-00135
- 431 31. Clatworthy J, Buick D, Hankins M, Weinman J, Horne R. The use and reporting of cluster  
432 analysis in health psychology: A review. *Br J Health Psychol*. 2005;10(3):329–58. doi:  
433 10.1348/135910705X25697.
- 434 32. Mayring P. Qualitative Inhaltsanalyse. Grundlagen und Techniken. Weinheim: Beltz; 2010.  
435

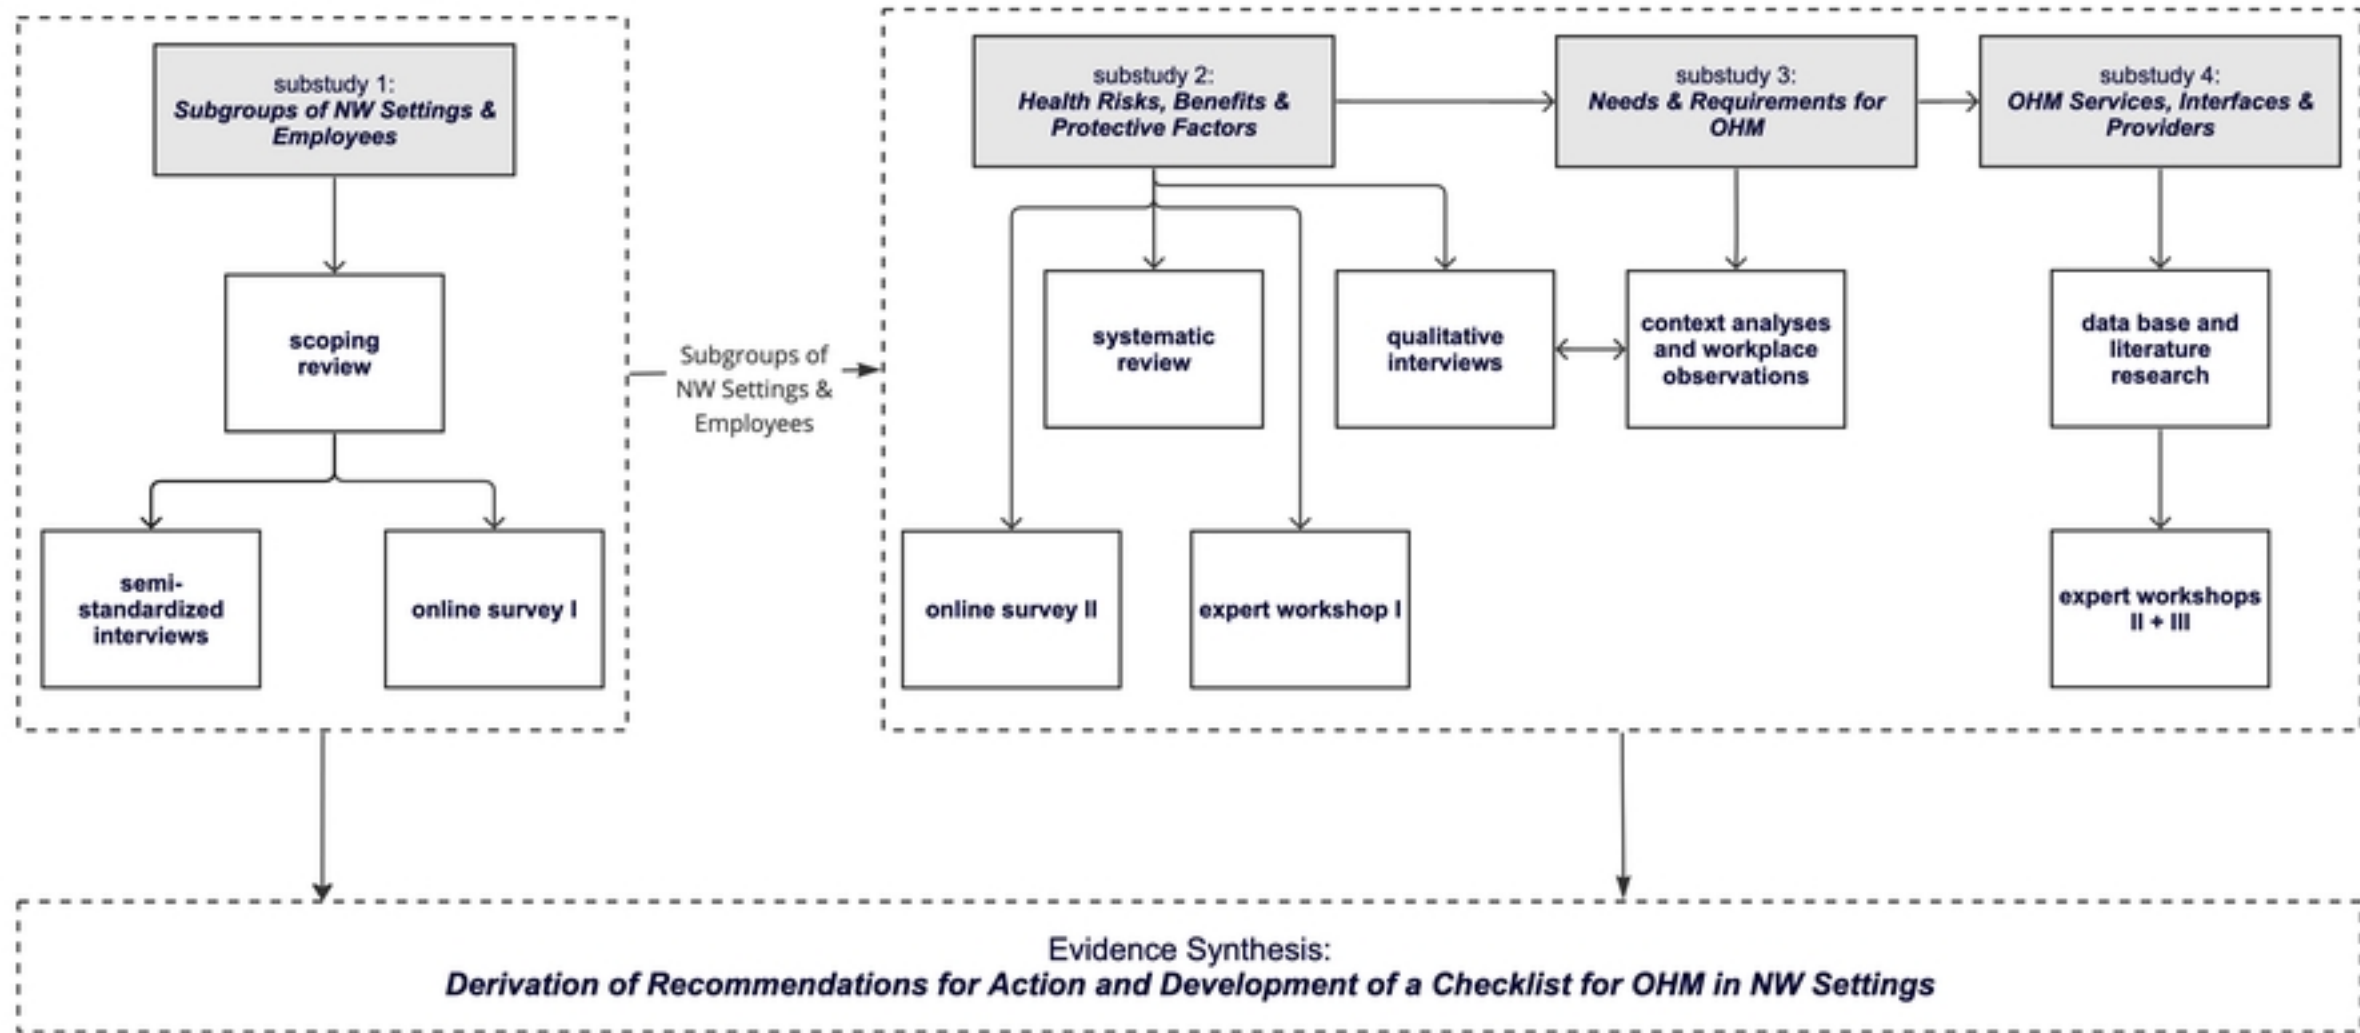

Fig 1
